# Supplementary material for: Oxidative Stability of Side-Streams from Cod Filleting—Effect of Antioxidant Dipping and Low-Temperature Storage
Source: MDPI journal article supplement (doi:10.3390/md21110591), 2023-11-13
Supplement: s1 [file s1]

## Supplementary material (S)

**Table S1.** Composition including dry matter, oil and protein content for the three different cod side-stream fractions, backbone, head and viscera. The content is reported as a range from the storage experiment of the different antioxidant treated fractions.

| Compositional parameter | Backbone    | Head        | Viscera     |
|-------------------------|-------------|-------------|-------------|
| Dry matter [%]          | 18.3 – 22.9 | 19.1 – 23.2 | 27.5 – 35.9 |
| Oil [% ww]              | 1.0 – 1.3   | 1.3 – 2.8   | 12.7 – 21.0 |
| Protein [% ww]          | 12.0 – 15.5 | 10.8 – 15.0 | 8.2 – 11.3  |

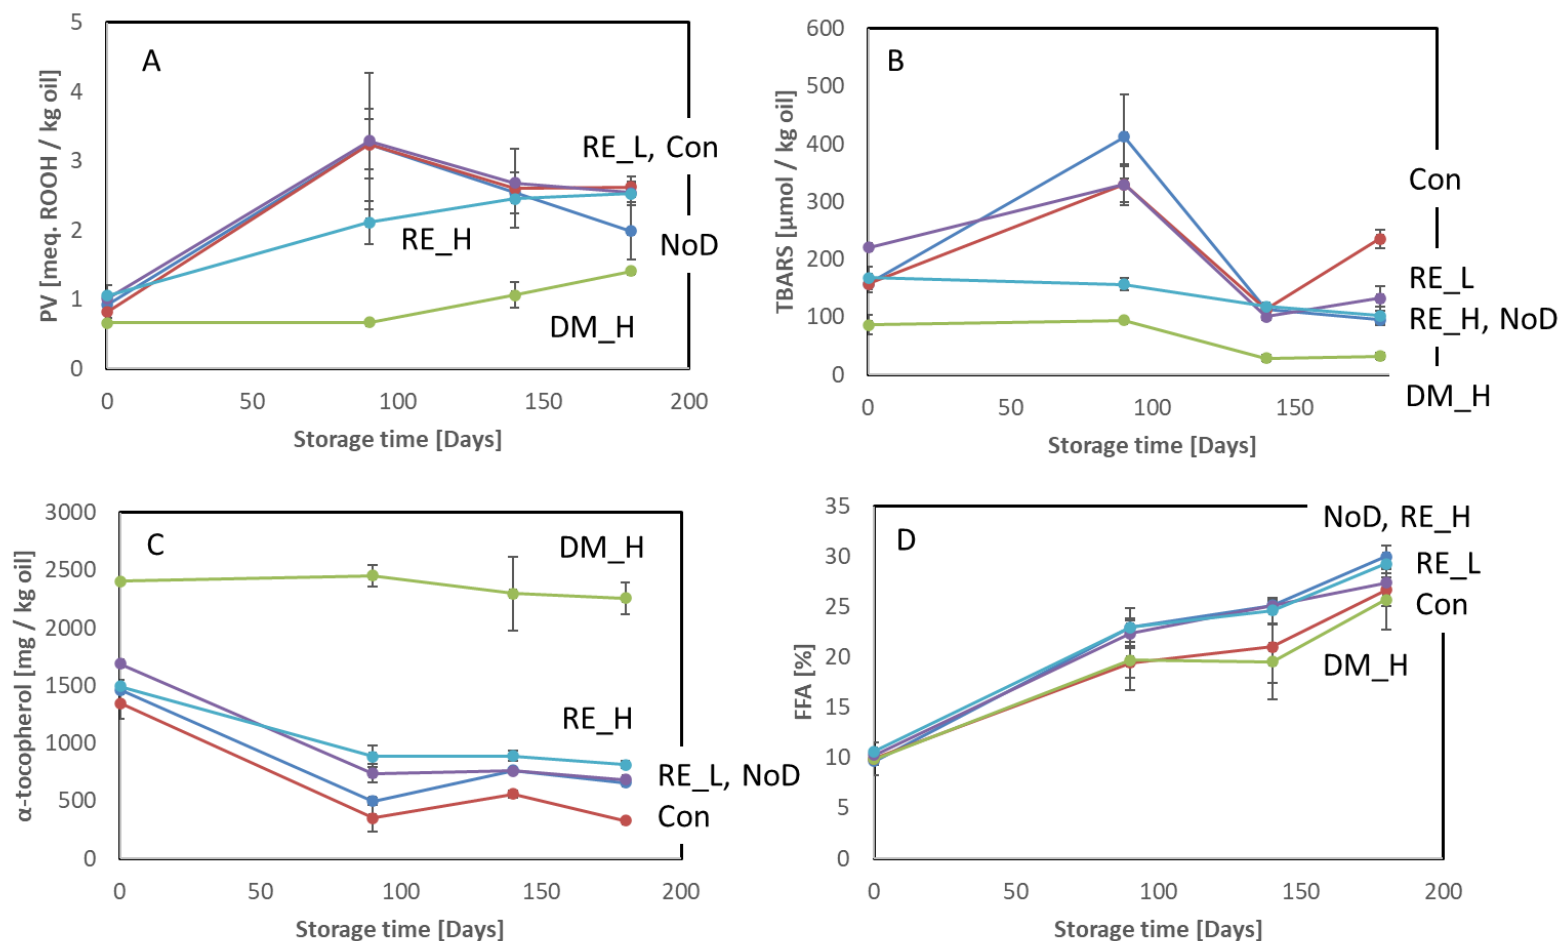

**Figure S1.** Antioxidant-treated and non-treated cod backbones stored at  $-20^{\circ}\text{C}$  for 6 months A) PV, B) TBARS, C)  $\alpha$ -tocopherol and D) FFA. NoD: No dipping; Con: Dipped in 0.9% NaCl solution; DM\_H: Dipped in 2% Duralox MANC dissolved in 0.9% NaCl solution; RE\_L: Dipped in 0.05% Rosemary extract dissolved in 0.9% NaCl solution; RE\_H: Dipped in 0.2% Rosemary extract dissolved in 0.9% NaCl solution. The results which are expressed on a lipid basis are shown as average  $\pm$  standard deviation ( $n=2$ ).

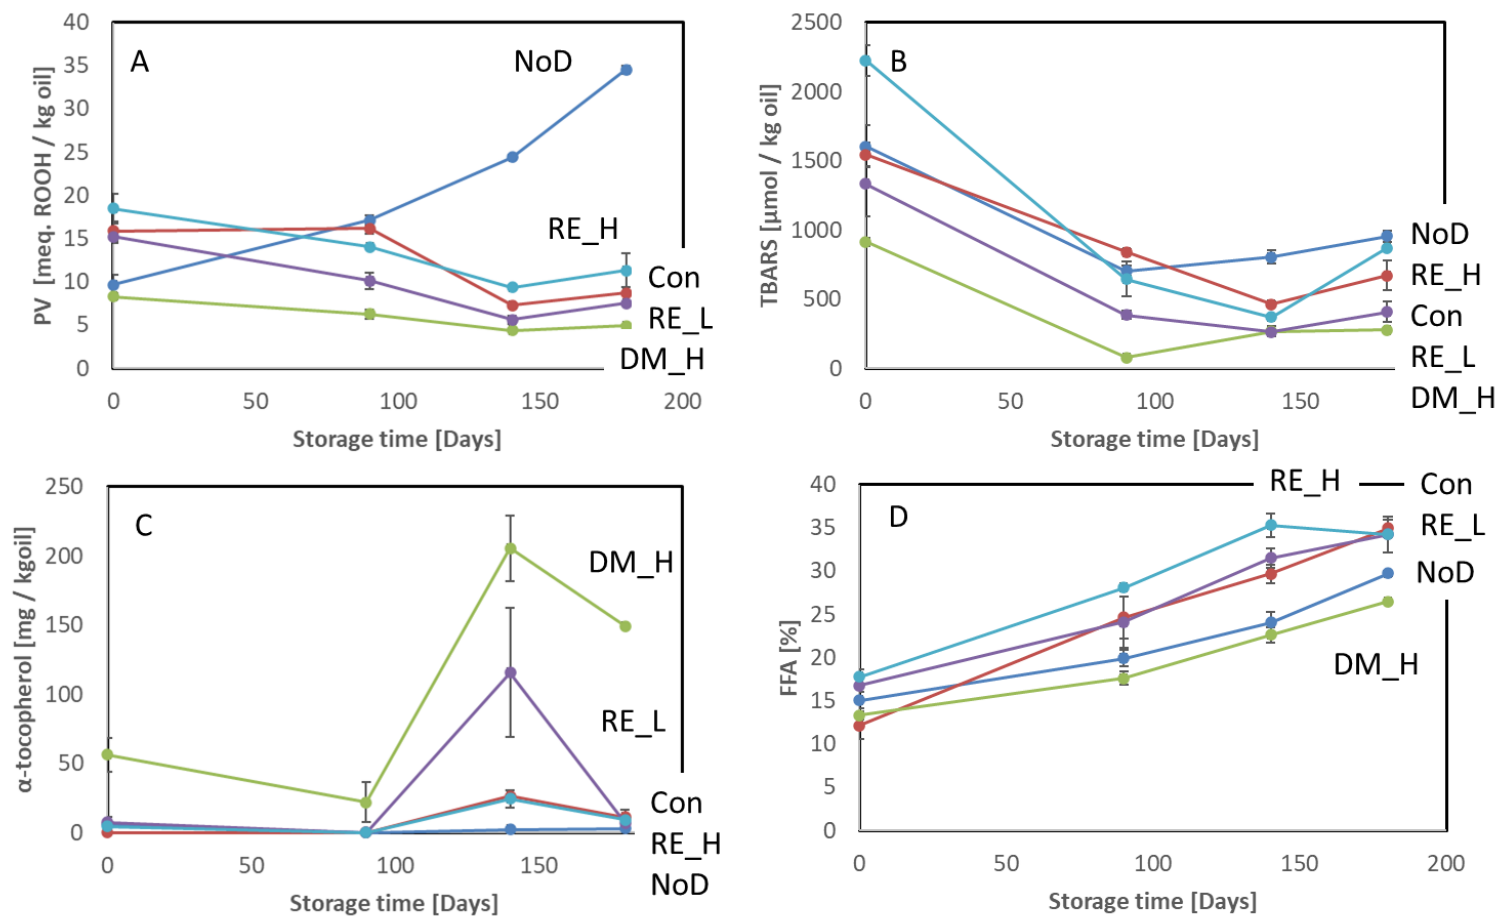

**Figure S2.** Antioxidant-treated and non-treated cod heads stored at  $-20^{\circ}\text{C}$  for 6 months A) PV, B) TBARS, C)  $\alpha$ -tocopherol and D) FFA. NoD: No dipping; Con: Dipped in 0.9% NaCl solution; DM\_H: Dipped in 2% Duralox MANC dissolved in 0.9% NaCl solution; RE\_L: Dipped in 0.05% Rosemary extract dissolved in 0.9% NaCl solution; RE\_H: Dipped in 0.2% Rosemary extract dissolved in 0.9% NaCl solution. The results which are expressed on a lipid basis are shown as average  $\pm$  standard deviation ( $n=2$ ).

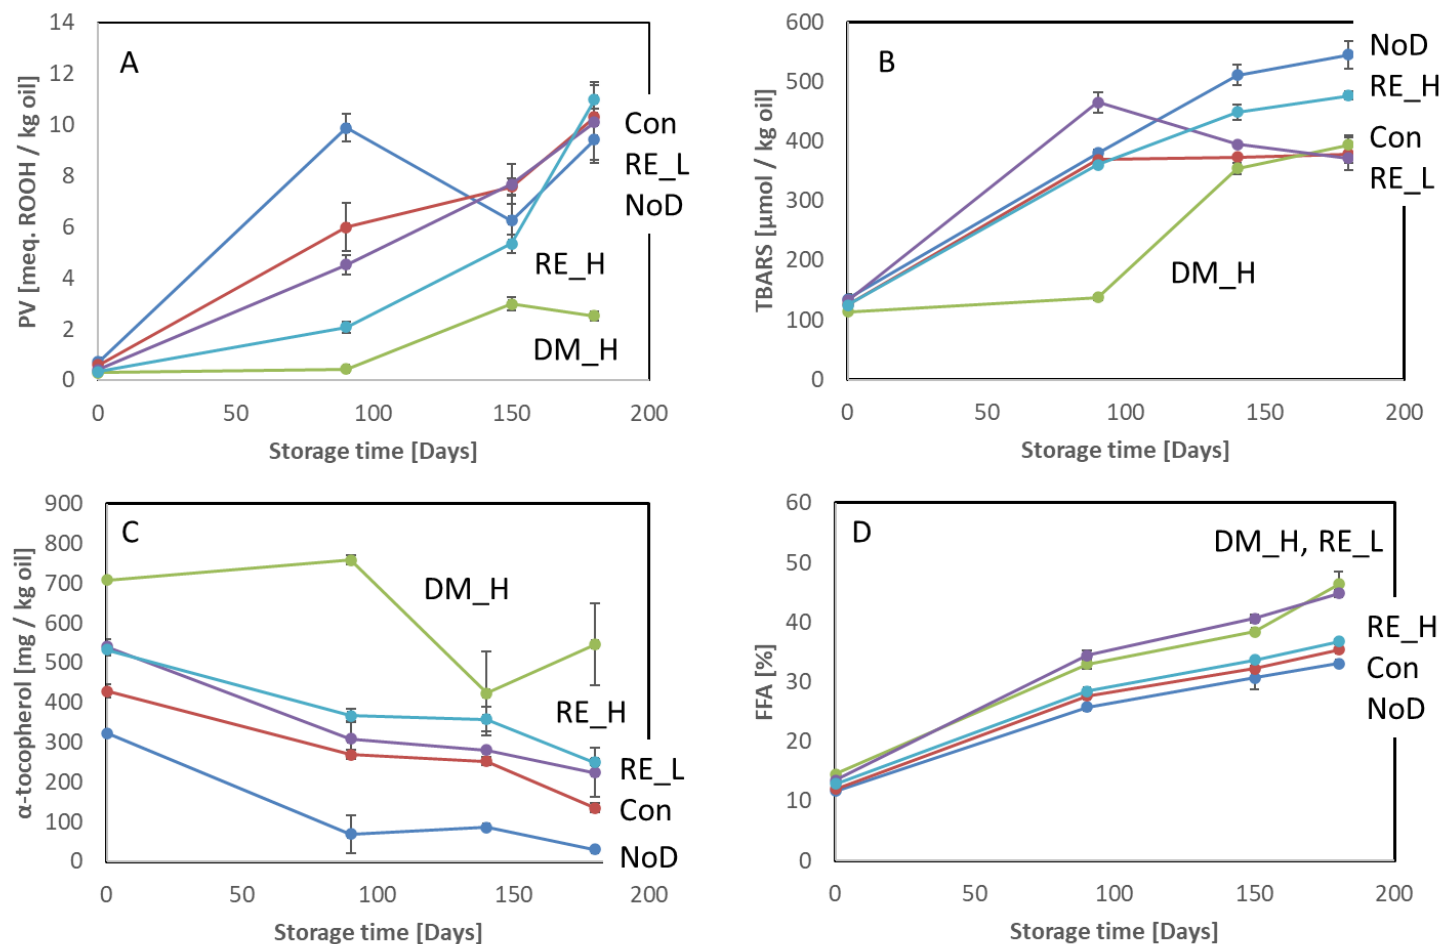

**Figure S3.** Antioxidant-treated and non-treated cod viscera fractions stored at -20°C for 6 months A) PV, B) TBARS, C) α-tocopherol and D) FFA. NoD: No dipping; Con: Dipped in 0.9% NaCl solution; DM\_H: Dipped in 2% Duralox MANC dissolved in 0.9% NaCl solution; RE\_L: Dipped in 0.05% Rosemary extract dissolved in 0.9% NaCl solution; RE\_H: Dipped in 0.2% Rosemary extract dissolved in 0.9% NaCl solution. The results which are expressed on a lipid basis are shown as average ± standard deviation (n=2).

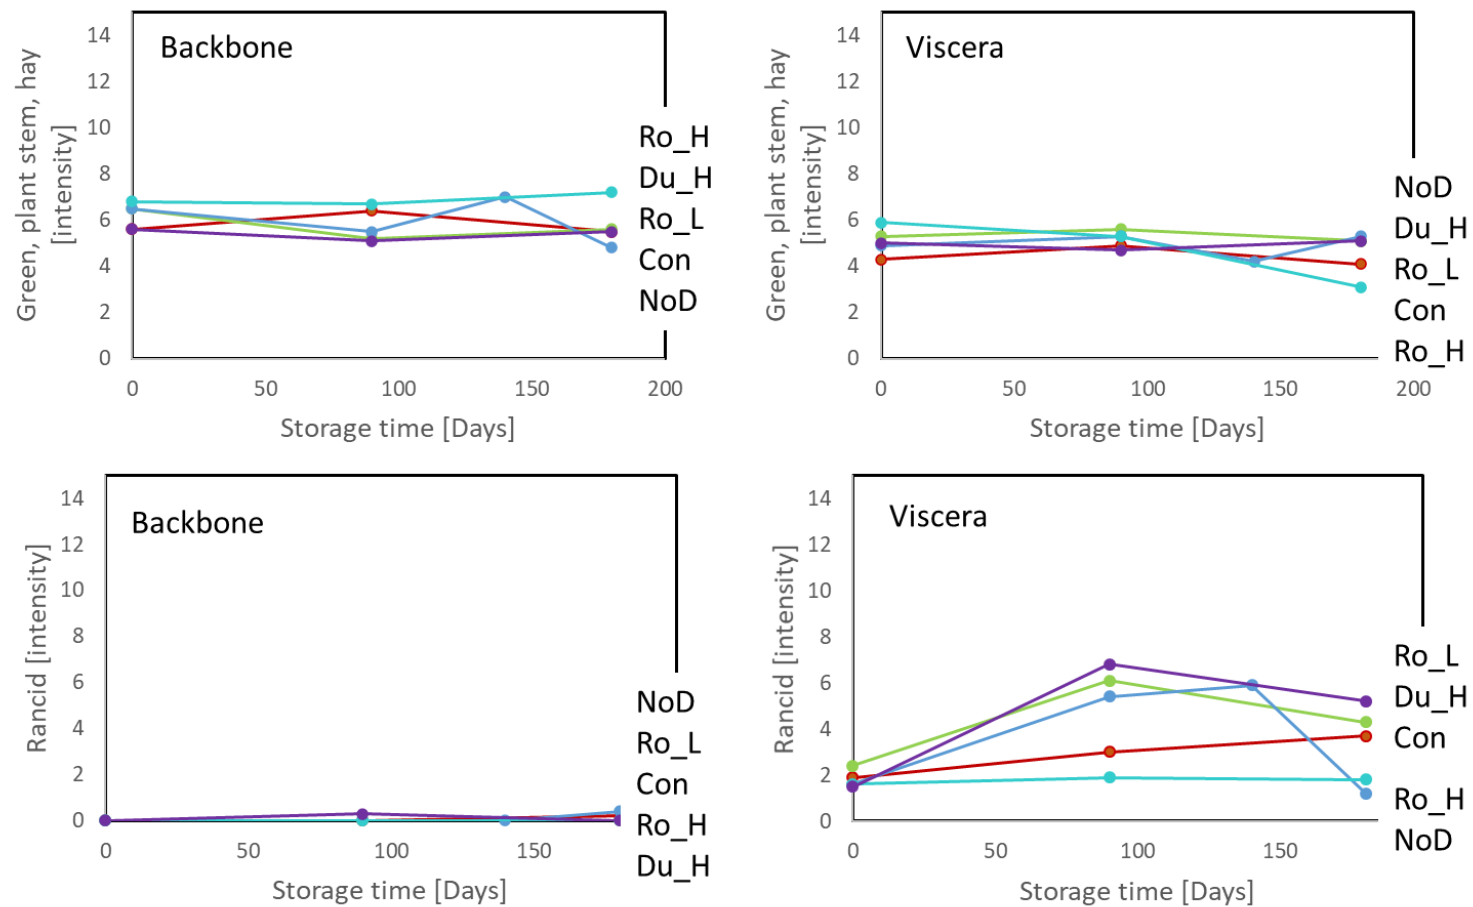

**Figure S4.** Sensory intensity of green/plant stem/hay and rancid for antioxidant-treated and non-treated cod backbones and viscera fractions stored at -20°C for 6 months. NoD: No dipping; Con: Dipped in 0.9% NaCl solution; DM\_H: Dipped in 2% Duralox MANC dissolved in 0.9% NaCl solution; RE\_L: Dipped in 0.05% Rosemary extract dissolved in 0.9% NaCl solution; RE\_H: Dipped in 0.2% Rosemary extract dissolved in 0.9% NaCl solution.
